# Supplementary material for: BF3·Et2O-mediated intramolecular cyclization of unsaturated amides: convenient synthesis of dihydroquinolin-2-one-BF2 complexes
Source: Royal Society of Chemistry journal article supplement (doi:10.1039/c4ra06151a), 2014-01-01

# **BF<sub>3</sub>·Et<sub>2</sub>O-Mediated Intramolecular Cyclization of Unsaturated Amides: Convenient Synthesis of Dihydroquinolin-2-one-BF<sub>2</sub> Complexes†**

Xu Liu, Qian Zhang, Xiaoqing Xin, Rui Zhang, Ning Zhang,\* Yongjiu Liang and Dewen Dong\*  
Changchun Institute of Applied Chemistry, Chinese Academy of Sciences, Changchun, 130022, China.

E-mails: [ning.zhang@ciac.ac.cn](mailto:ning.zhang@ciac.ac.cn); [dwdong@ciac.ac.cn](mailto:dwdong@ciac.ac.cn)

## Electronic Supplementary Information

Table of contents.....S1

Copies of NMR spectra of compounds **1-3** and **5**.....S2-S24



1m

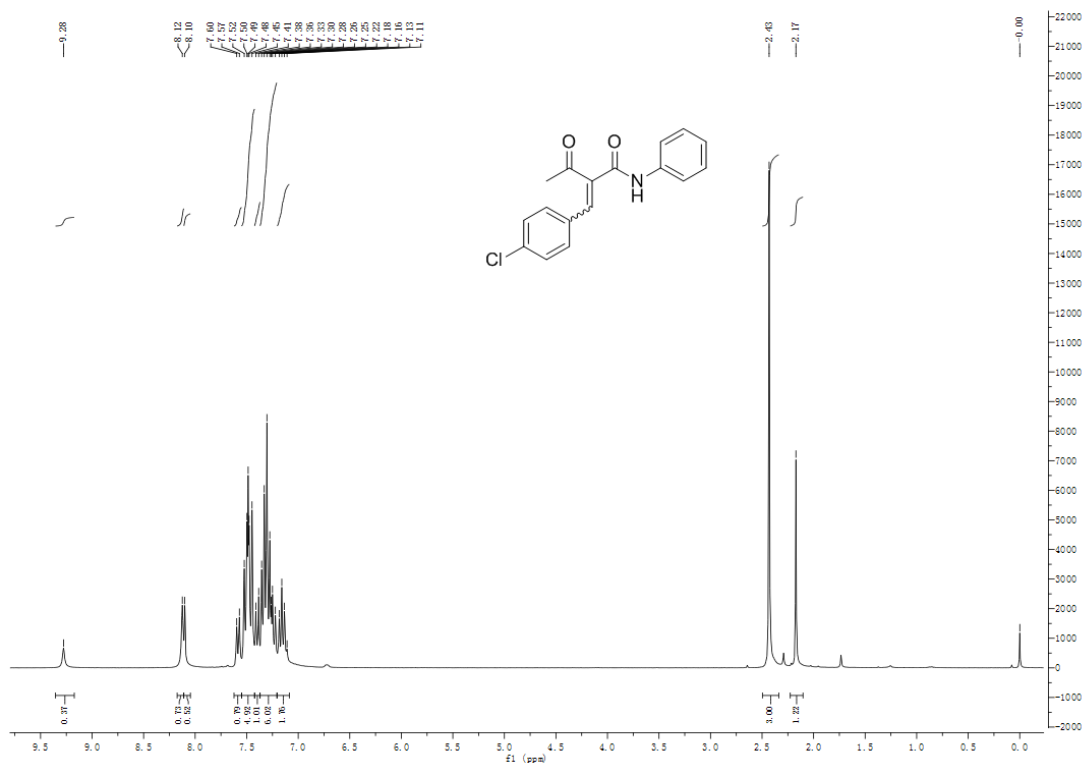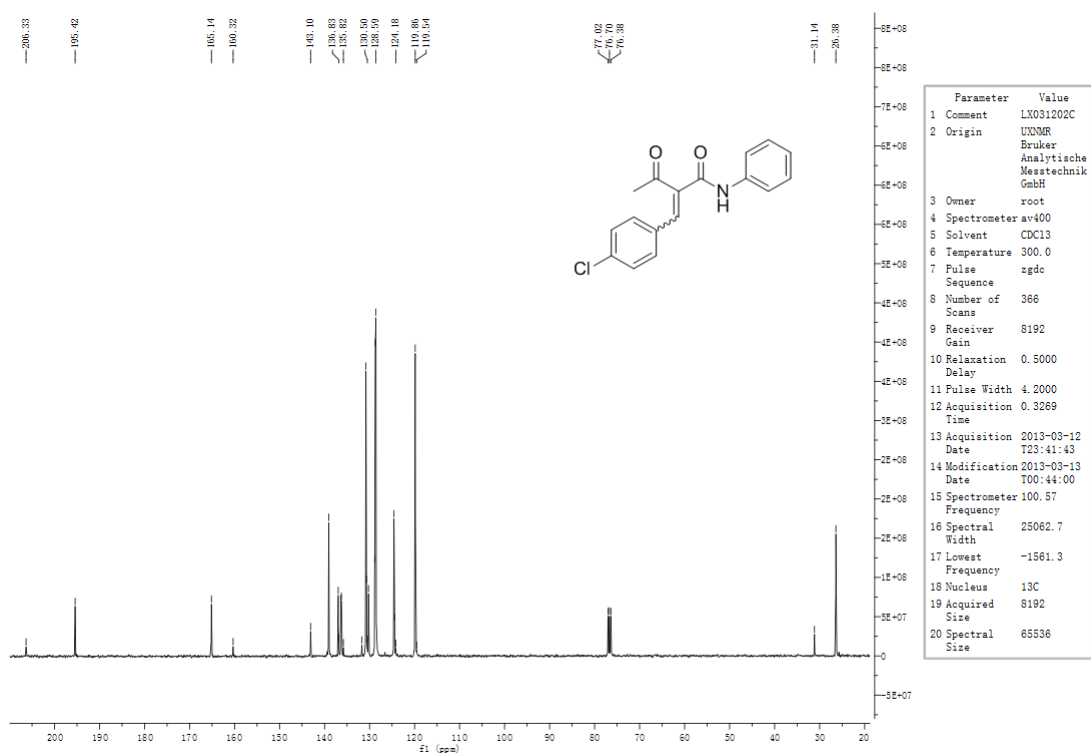

2a

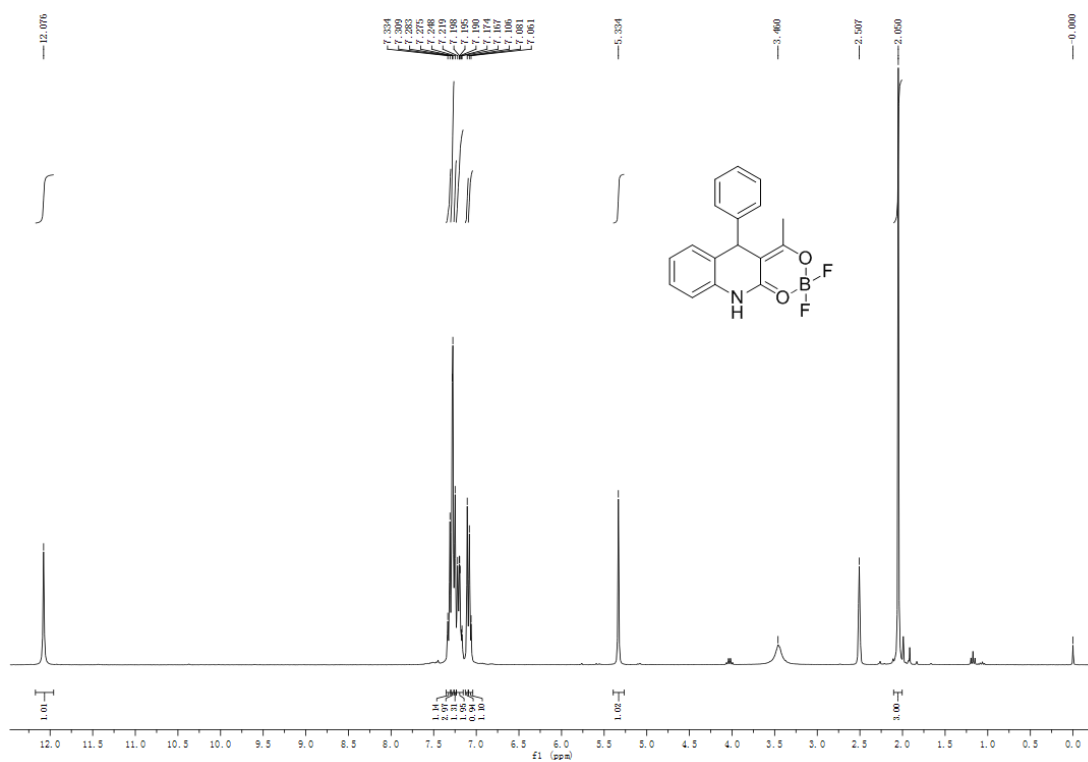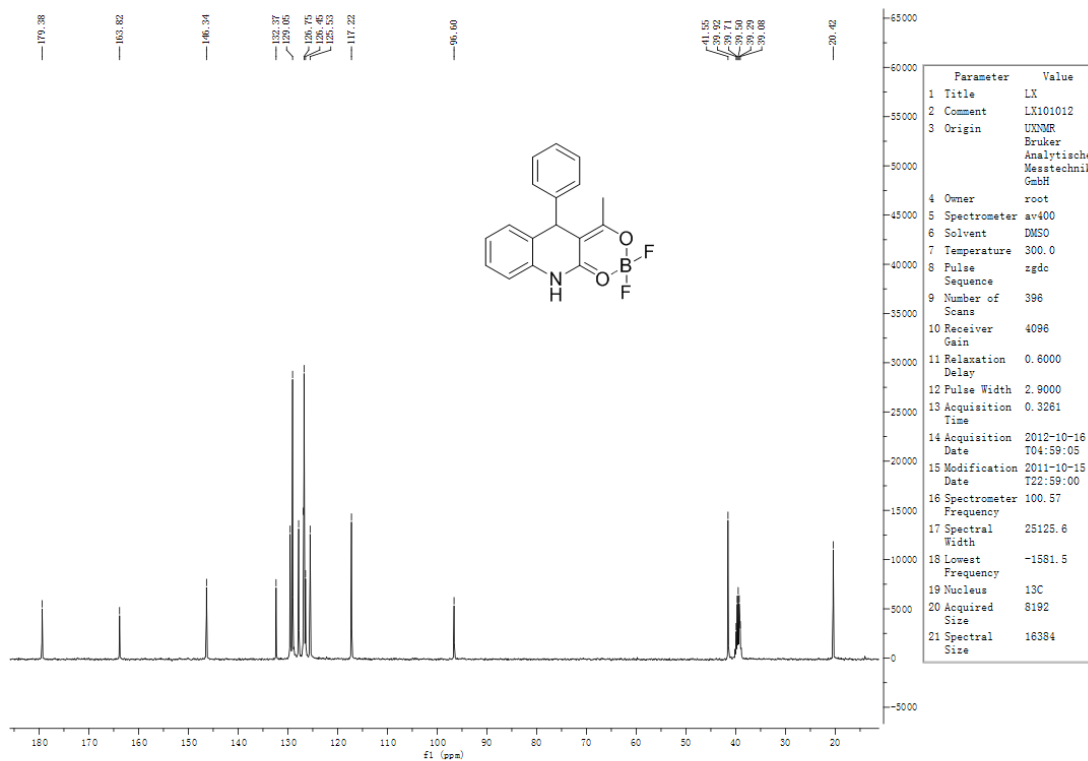

2b

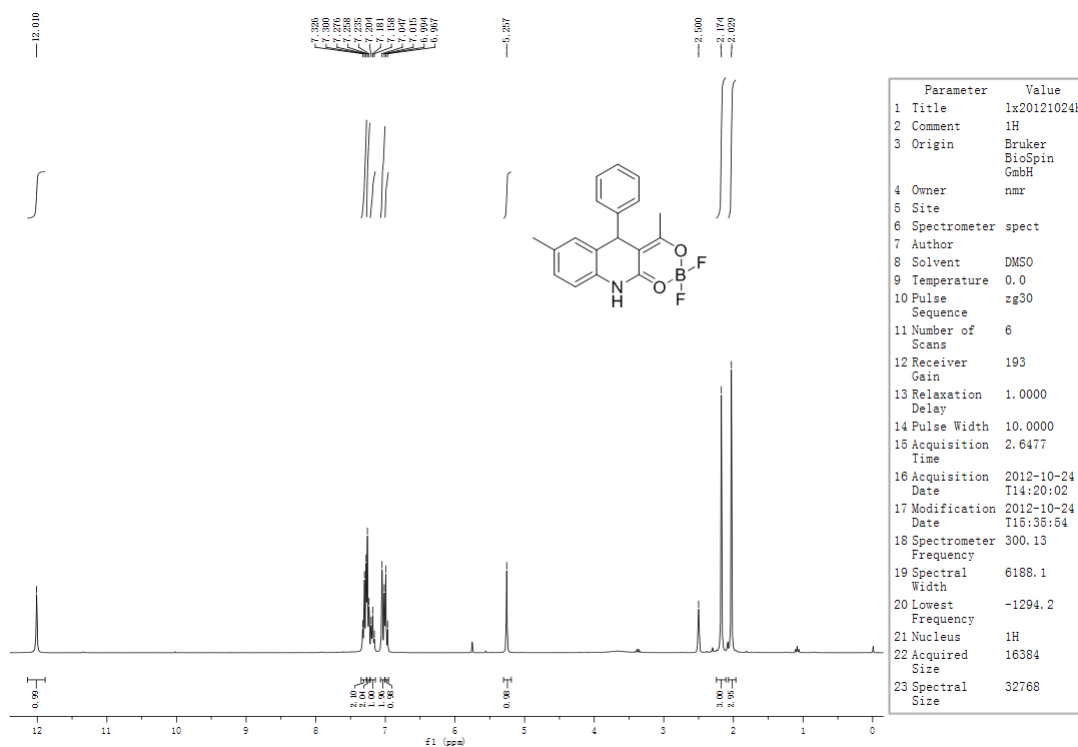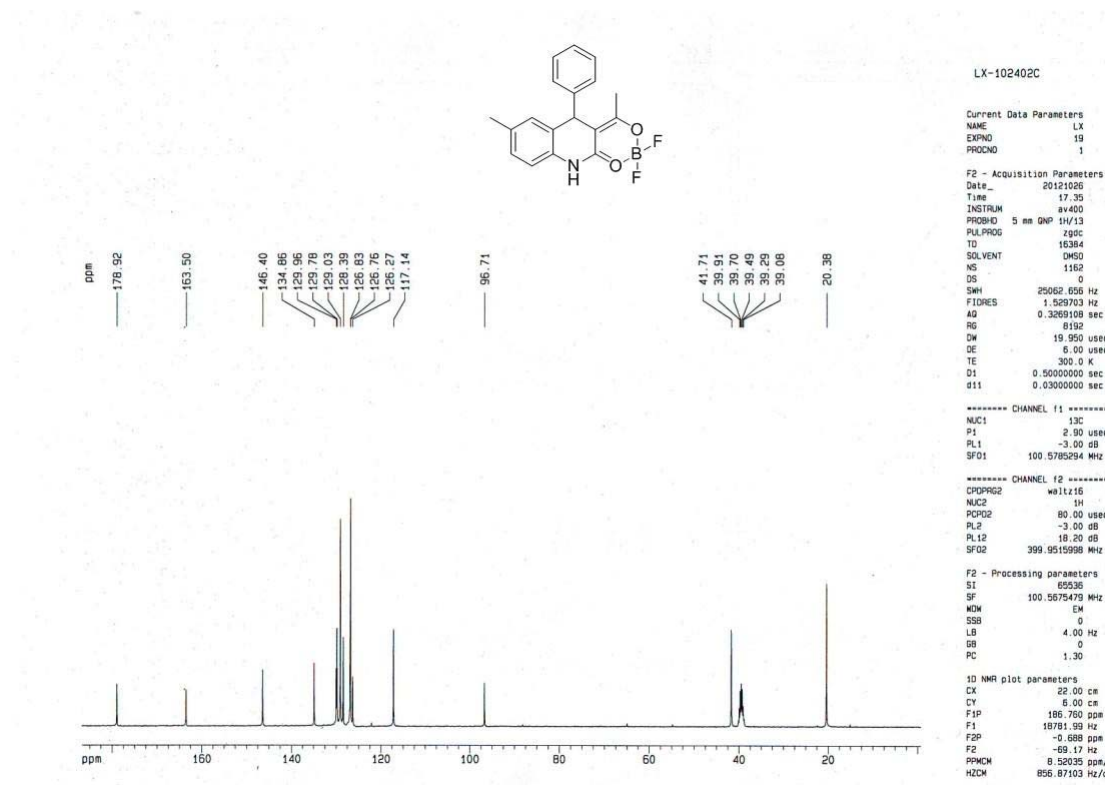



2d

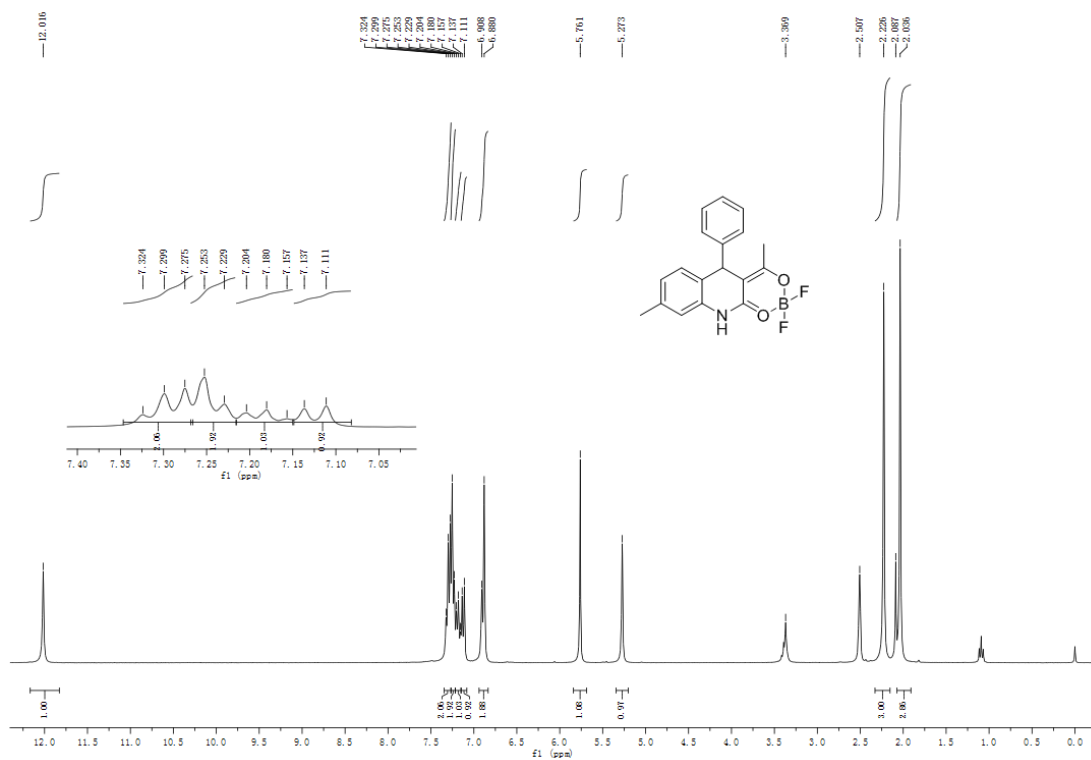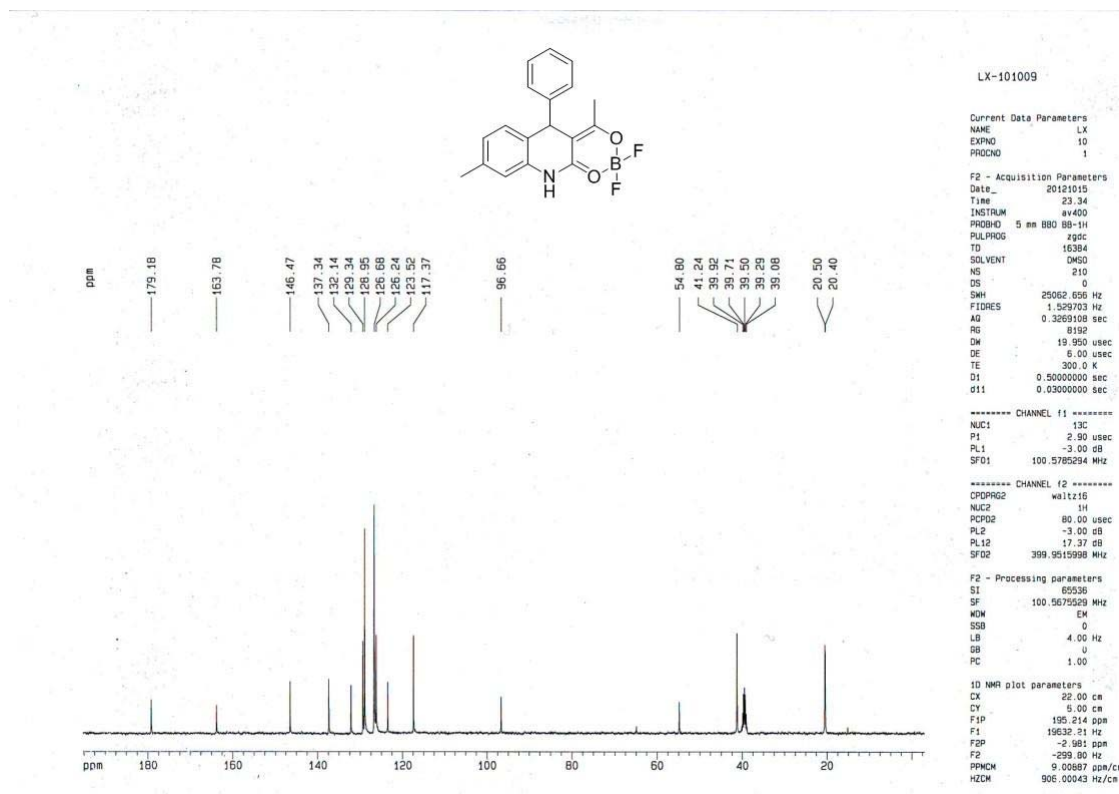

2e

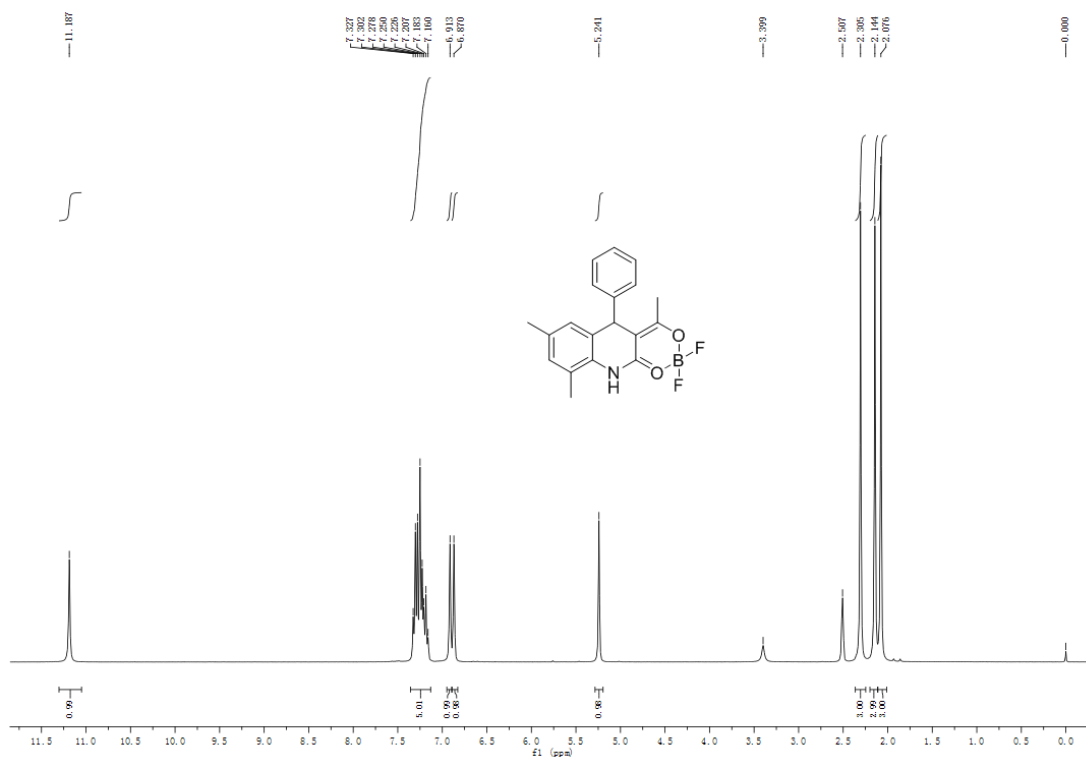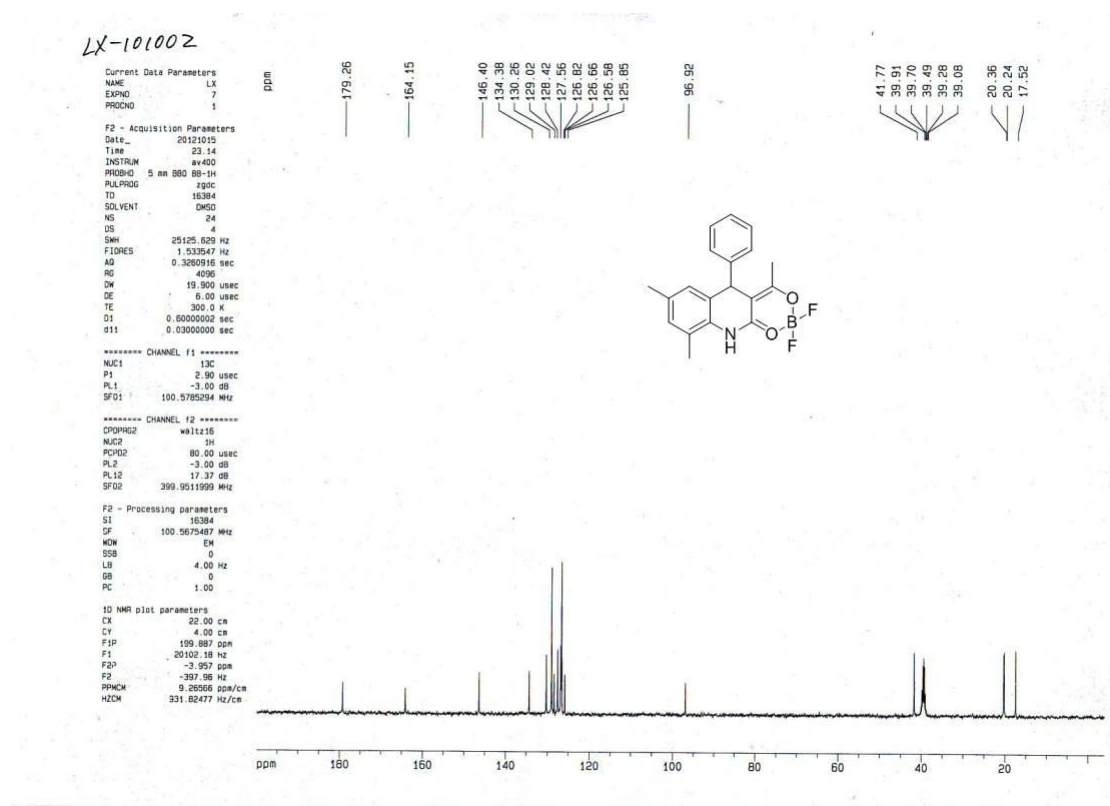



2f

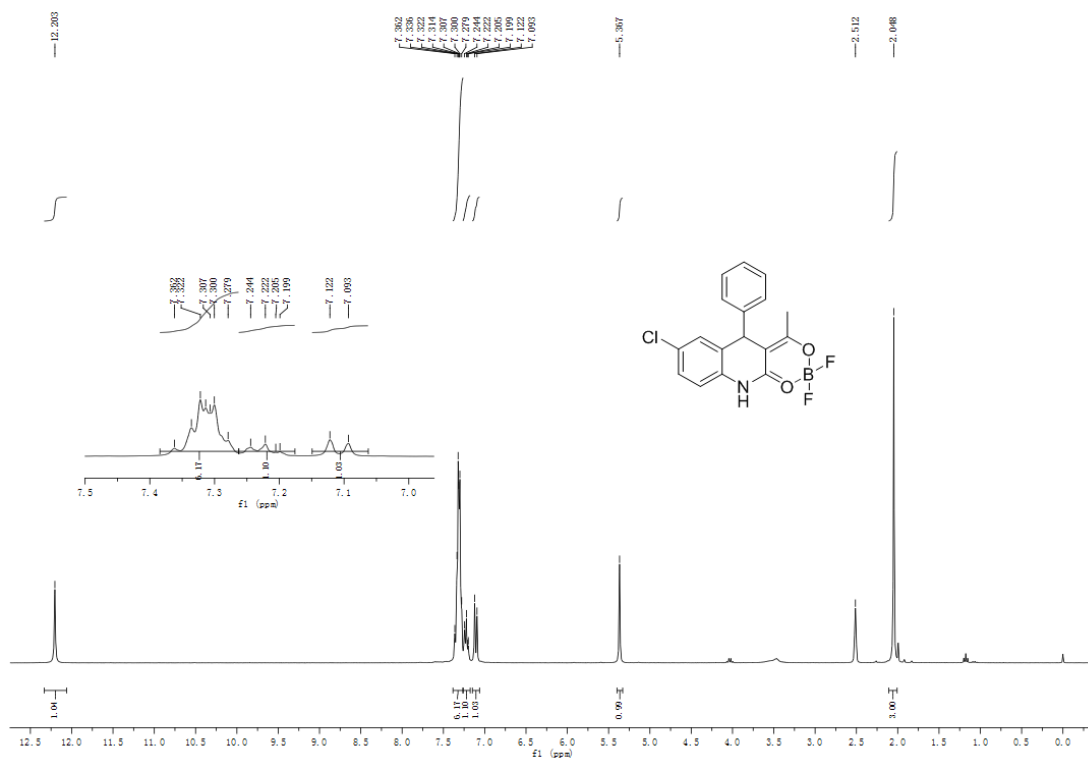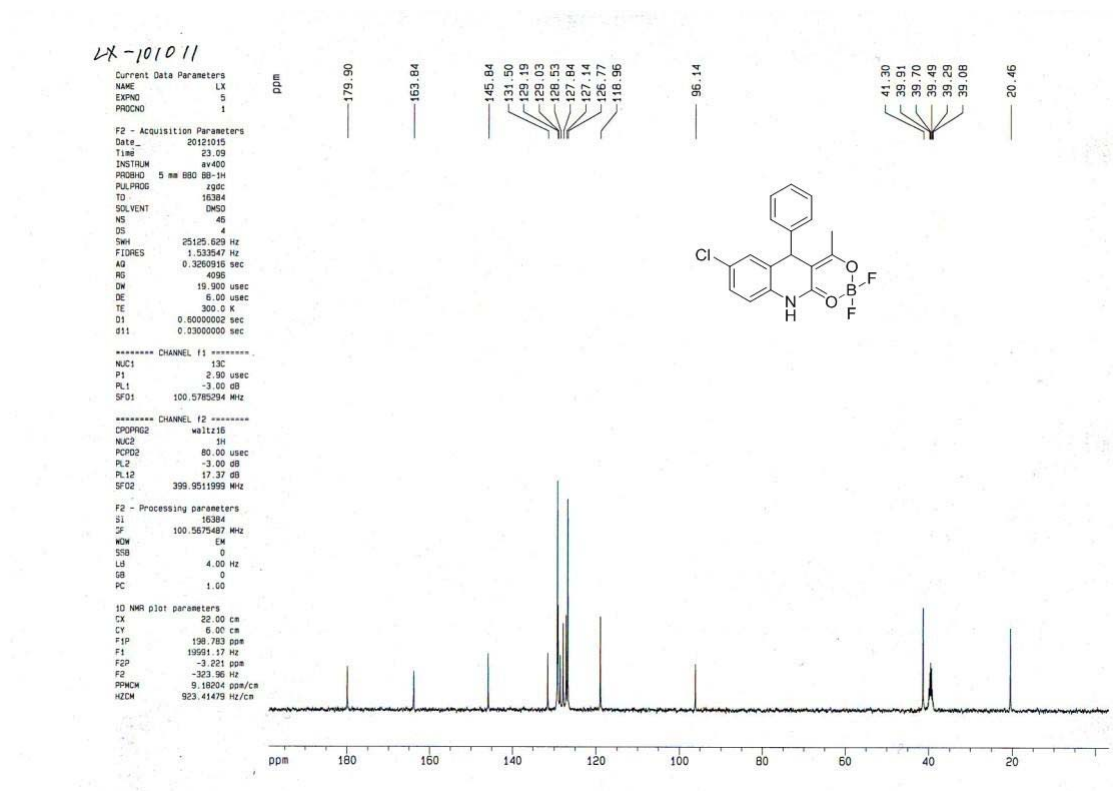

2g

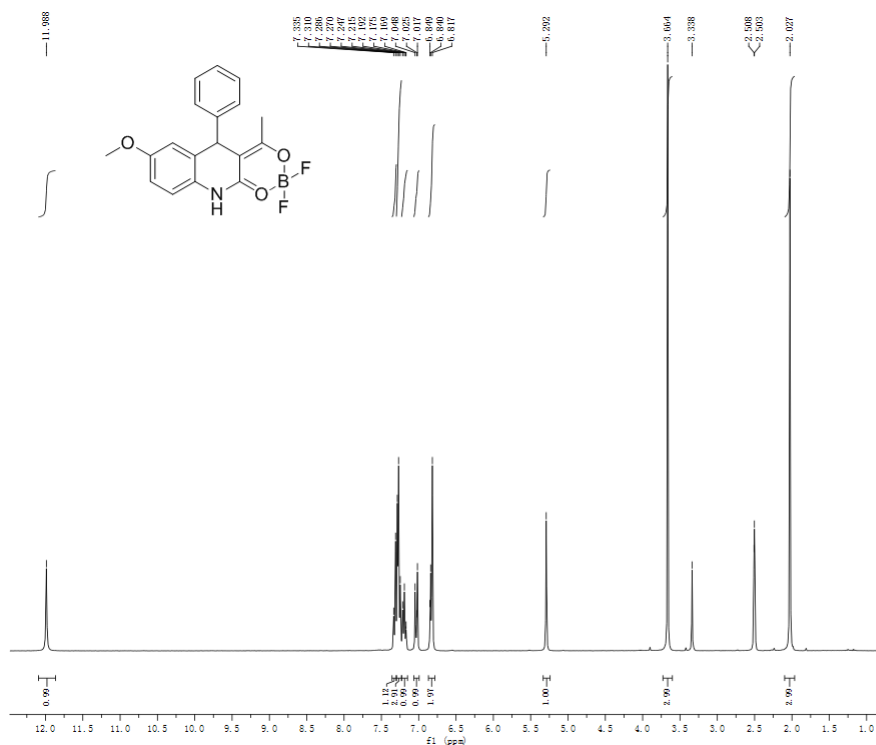

| Parameter                 | Value                     |
|---------------------------|---------------------------|
| 1 Title                   | 1x20120822h               |
| 2 Comment                 | 1H                        |
| 3 Origin                  | Bruker<br>BioSpin<br>GmbH |
| 4 Owner                   | nmr                       |
| 5 Site                    |                           |
| 6 Spectrometer            | spect                     |
| 7 Author                  |                           |
| 8 Solvent                 | DMSO                      |
| 9 Temperature             | 0.0                       |
| 10 Pulse                  | zg30                      |
| Sequence                  |                           |
| 11 Number of Scans        | 9                         |
| 12 Receiver Gain          | 193                       |
| 13 Relaxation Delay       | 1.0000                    |
| 14 Pulse Width            | 10.0000                   |
| 15 Acquisition Time       | 2.6477                    |
| 16 Acquisition Date       | 2012-08-22<br>14:48:28    |
| 17 Modification Date      | 2012-08-22<br>16:28:57    |
| 18 Spectrometer Frequency | 300.13                    |
| 19 Spectral Width         | 6188.1                    |
| 20 Lowest Frequency       | -1293.3                   |
| 21 Nucleus                | 1H                        |
| 22 Acquired Size          | 16384                     |
| 23 Spectral Size          | 32768                     |

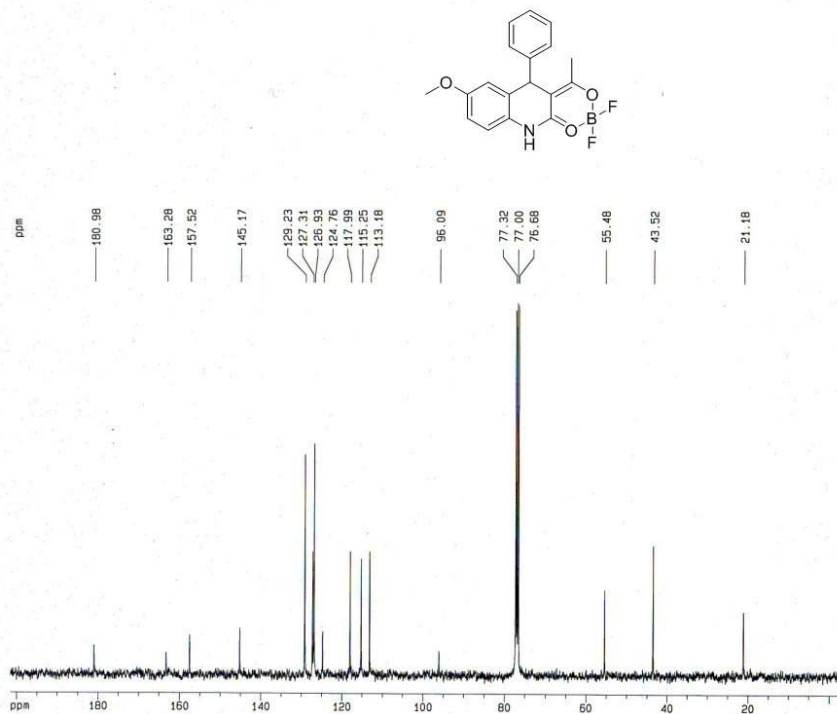

LX-082101C

| Current Data Parameters     |                 |
|-----------------------------|-----------------|
| NAME                        | LX              |
| EXPNO                       | 4               |
| PROCNO                      | 1               |
| F2 - Acquisition Parameters |                 |
| Date_                       | 20120823        |
| Time                        | 0.00            |
| INSTRUM                     | av400           |
| PROBHD                      | 5 mm BBO BB-1H  |
| PULPROG                     | zgpg            |
| TD                          | 16384           |
| SOLVENT                     | DMSO            |
| NS                          | 4463            |
| DS                          | 0               |
| SWH                         | 25062.656 Hz    |
| FIDRES                      | 1.529703 Hz     |
| AQ                          | 0.3269108 sec   |
| RG                          | 8192            |
| DW                          | 19.950 usec     |
| DE                          | 6.00 usec       |
| TE                          | 300.0 K         |
| D1                          | 0.50000000 sec  |
| d11                         | 0.03000000 sec  |
| ***** CHANNEL f1 *****      |                 |
| NUC1                        | 13C             |
| P1                          | 2.70 usec       |
| PL1                         | -3.00 dB        |
| SFO1                        | 100.6261254 MHz |
| ***** CHANNEL f2 *****      |                 |
| CPDPRG2                     | waltz16         |
| NUC2                        | 1H              |
| PCPD2                       | 80.00 usec      |
| PL2                         | -3.00 dB        |
| PL12                        | 18.20 dB        |
| SFO2                        | 399.9515998 MHz |
| F2 - Processing parameters  |                 |
| SI                          | 65536           |
| SF                          | 100.626110 MHz  |
| WDW                         | EM              |
| SSB                         | 0               |
| LB                          | 4.00 Hz         |
| GB                          | 0               |
| PC                          | 0.30            |
| ID NMR plot parameters      |                 |
| CX                          | 22.00 cm        |
| CY                          | 10.00 cm        |
| F1P                         | 201.587 ppm     |
| F1                          | 20267.04 Hz     |
| F2P                         | -2.271 ppm      |
| F2                          | -228.38 Hz      |
| FREQM                       | 9.25353 ppm/cm  |
| KZCM                        | 931.61041 Hz/cm |

2h

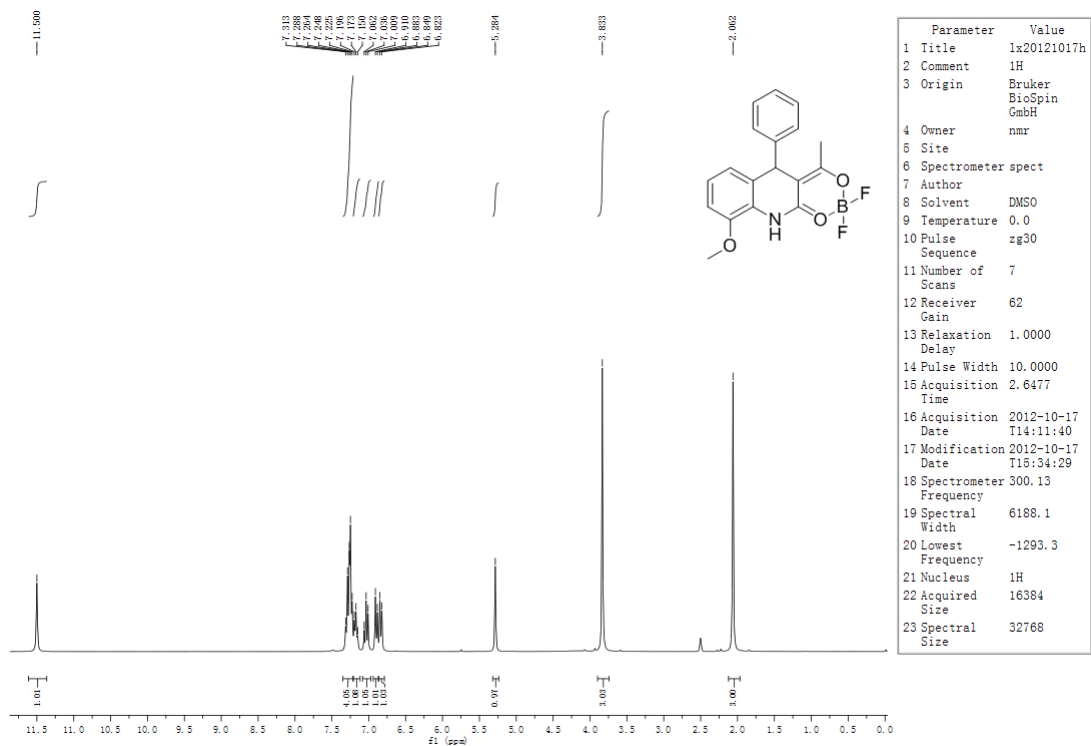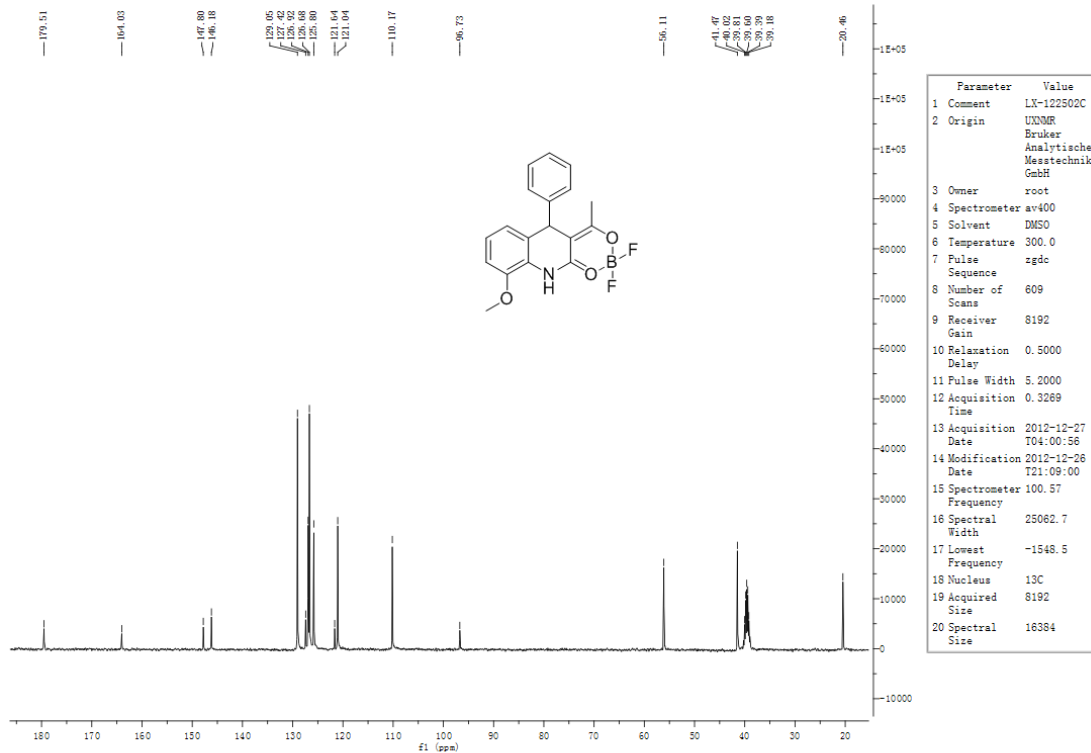

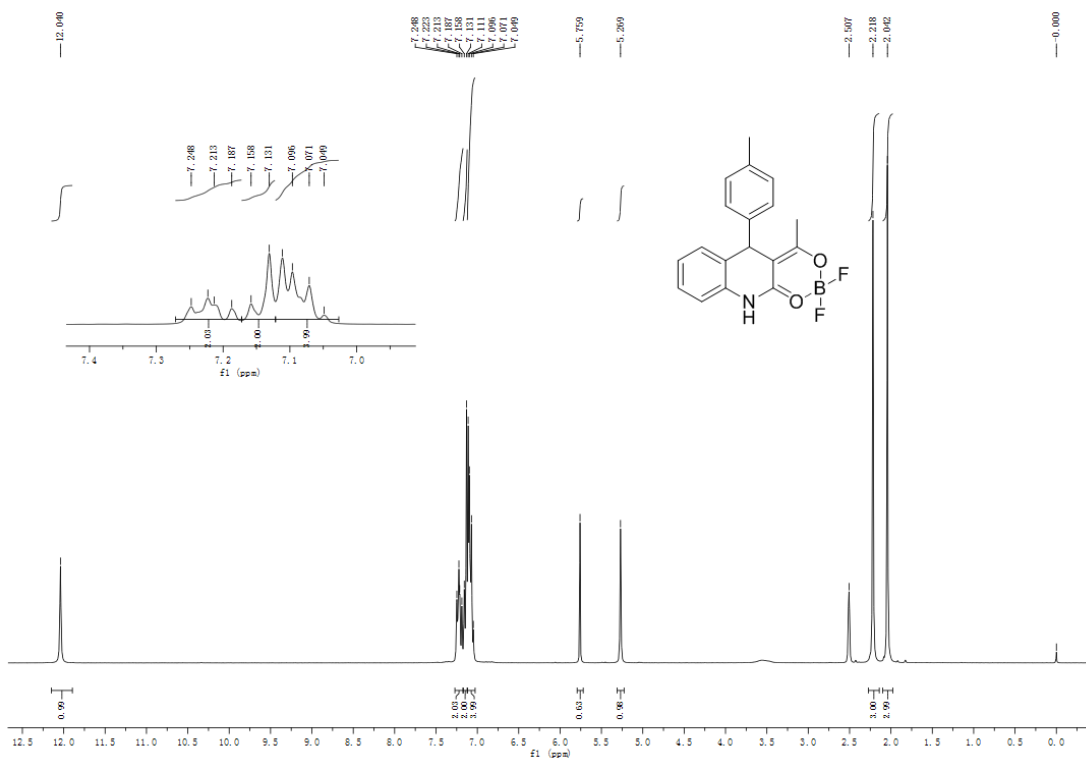

LX-101003

```

Current Data Parameters
NAME LX
EXPNO 9
PROCNO 1

F2 - Acquisition Parameters
Date_ 20121015
Time 23.04
INSTRUM mv400
PROBHD 5 mm BBO BB-1H
PULPROG zgpg
TD 65536
SOLVENT DMSO
NS 118
DS 4
SWH 25125.629 Hz
FIDRES 1.533947 Hz
AQ 0.3262916 sec
RG 4096
DW 19.900 usec
DE 6.00 usec
TE 300.0 K
D1 0.6000002 sec
g11 0.0300000 sec

***** CHANNEL f1 *****
NUC1 13C
P1 2.00 usec
PL1 -3.00 dB
SFO1 100.6261200 MHz

***** CHANNEL f2 *****
CPDPRG2 waltz16
NUC2 1H
PCPD2 80.00 usec
PL2 -3.00 dB
PL12 17.37 dB
SFO2 399.9611599 MHz

F2 - Processing parameters
SI 16384
SF 100.6261200 MHz
WDW EM
SSB 0
LB 4.00 Hz
GB 0
PC 1.00

1D NMR plot parameters
CX 22.00 cm
CY 6.00 cm
F1P 204.993 ppm
F1 20615.63 Hz
F2P 2.252 ppm
F2 226.50 Hz
PPH2 9.21946 ppm/cm
VPC 926.77869 Hz/cm
    
```

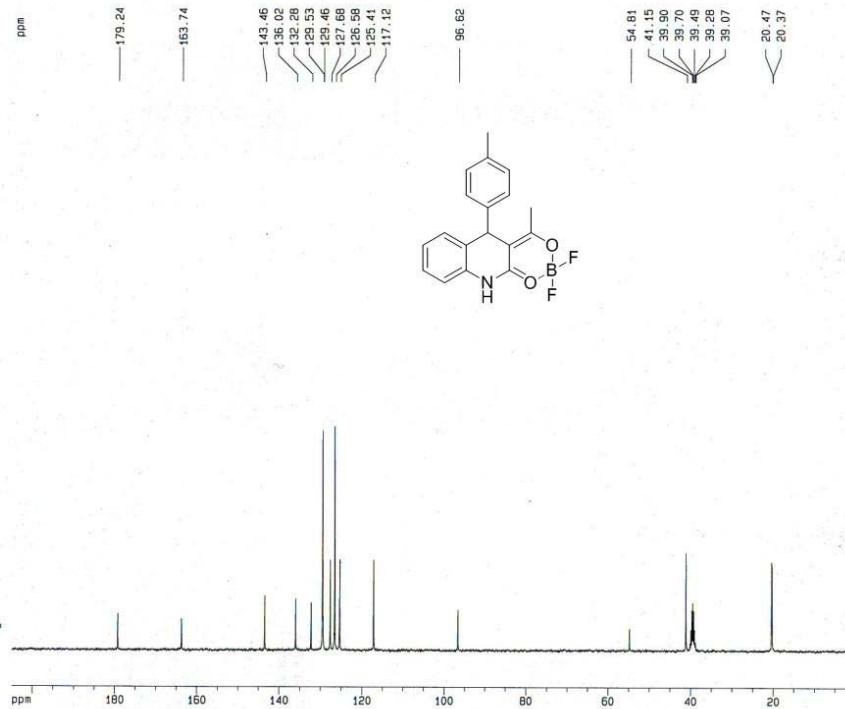

2j

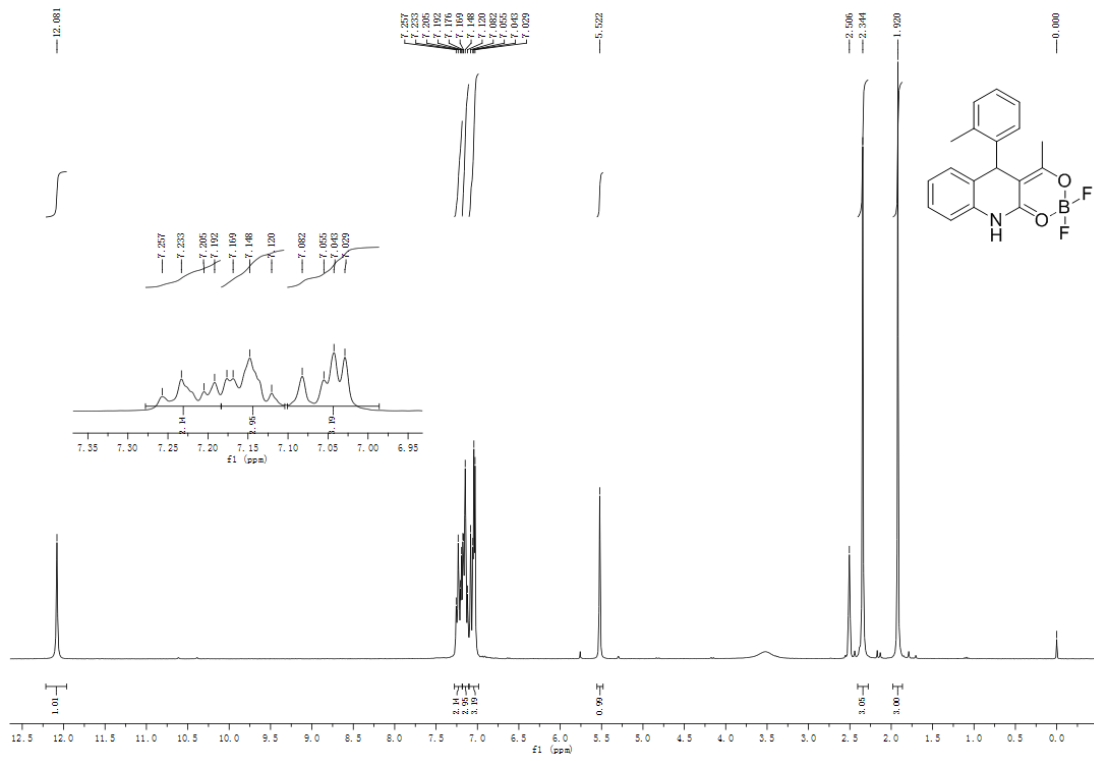

```

Current Data Parameters
NAME          LX
EXPNO        6
PROCNO       1

F2 - Acquisition Parameters
Date_        20121015
Time         23.12
INSTRUM      ssi4000
PROBHD       5 mm BBO BB-1H
PULPROG      zgpg
TD           65536
SOLVENT      DMSO
NS           73
DS           4
SWH          25125.829 Hz
FIDRES       1.533947 Hz
AQ           0.3860916 sec
RG           4096
DM           19.900 usec
DE           6.00 usec
TE           300.2 K
D1           0.50000002 sec
d11          0.03000000 sec

***** CHANNEL f1 *****
NUC1         13C
P1           2.90 usec
PL1          -3.00 dB
SFO1        100.6251994 MHz

***** CHANNEL f2 *****
CPDPRG2     waltz16
NUC2         1H
PCPD2       80.00 usec
PL2          -3.00 dB
PL12        17.37 dB
SFO2        399.9511999 MHz

F2 - Processing parameters
SI           16384
SF           100.625198 MHz
WDW          EM
SSB          0
LB           4.00 Hz
GB           0
PC           1.00

ID NMR plot parameters
CX           22.00 cm
CY           4.00 cm
F1P         19899.07 Hz
F2P         -3.989 ppm
F2          -401.03 Hz
PMCHW       9.08168 ppm/cm
HZCM        913.32275 Hz/cm
  
```

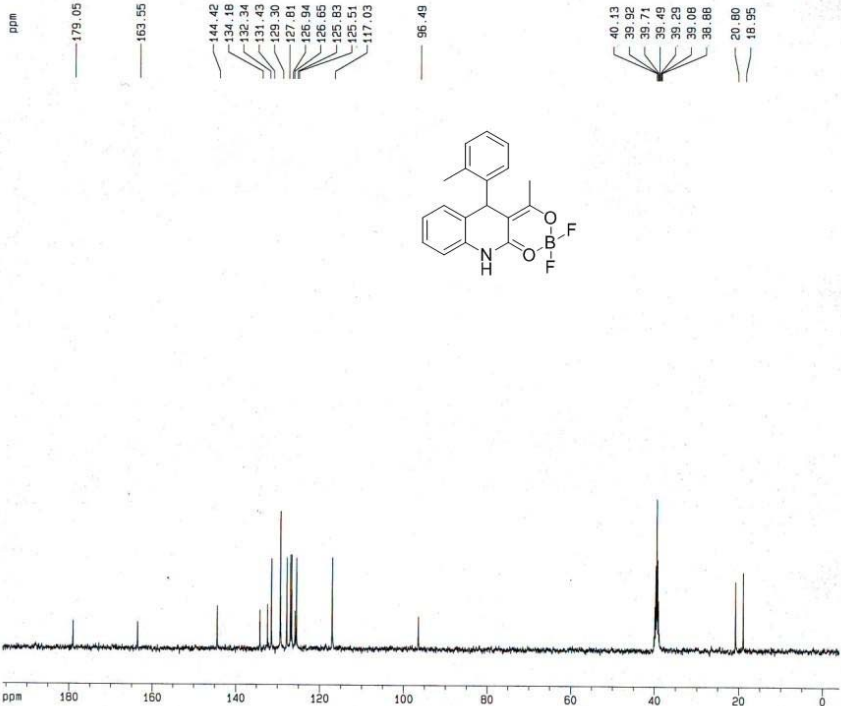

2k

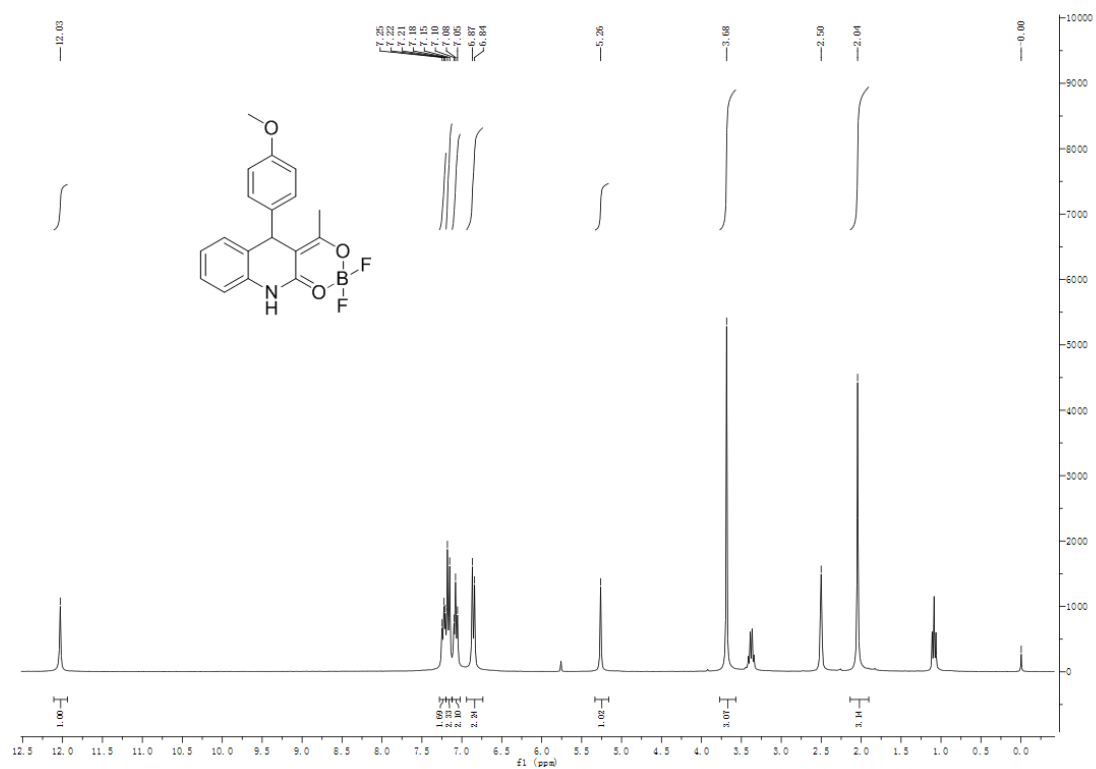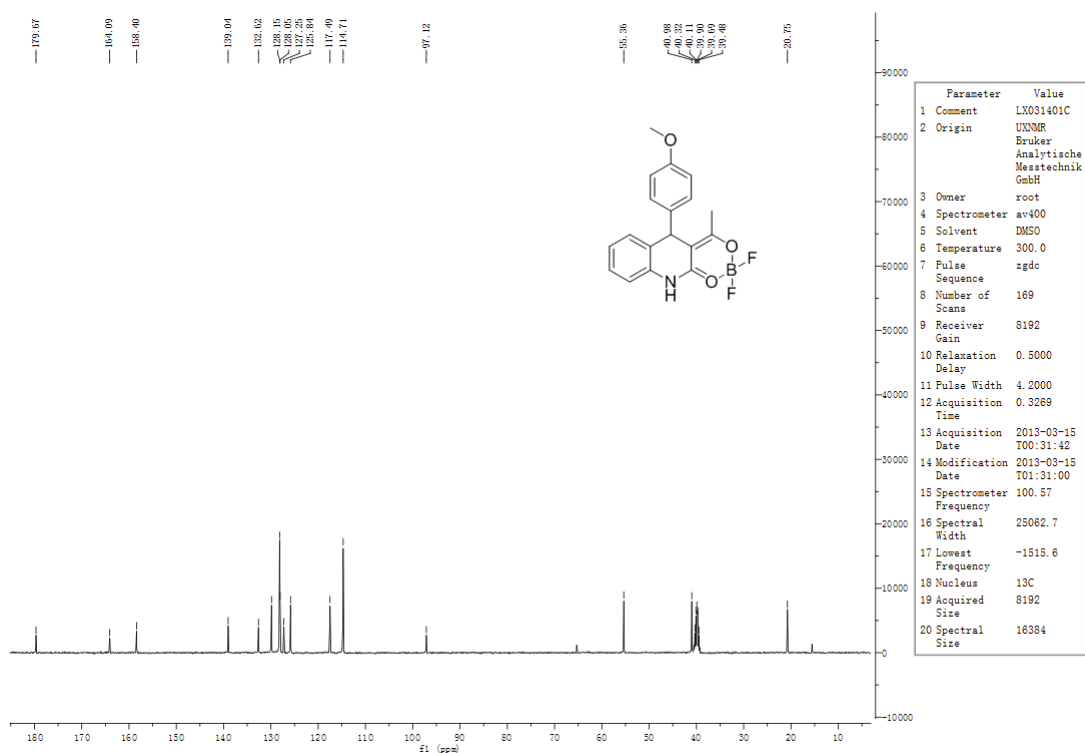

| Parameter                 | Value                                                |
|---------------------------|------------------------------------------------------|
| 1 Comment                 | LX031401C                                            |
| 2 Origin                  | UNSW<br>Bruker<br>Analytische<br>Messtechnik<br>GmbH |
| 3 Owner                   | root                                                 |
| 4 Spectrometer            | av400                                                |
| 5 Solvent                 | DMSO                                                 |
| 6 Temperature             | 300.0                                                |
| 7 Pulse Sequence          | zgdc                                                 |
| 8 Number of Scans         | 169                                                  |
| 9 Receiver Gain           | 8192                                                 |
| 10 Relaxation Delay       | 0.5000                                               |
| 11 Pulse Width            | 4.2000                                               |
| 12 Acquisition Time       | 0.3289                                               |
| 13 Acquisition Date       | 2013-03-15<br>T00:31:42                              |
| 14 Modification Date      | 2013-03-15<br>T01:31:00                              |
| 15 Spectrometer Frequency | 100.57                                               |
| 16 Spectral Width         | 25082.7                                              |
| 17 Lowest Frequency       | -1515.6                                              |
| 18 Nucleus                | 13C                                                  |
| 19 Acquired Size          | 8192                                                 |
| 20 Spectral Size          | 16384                                                |

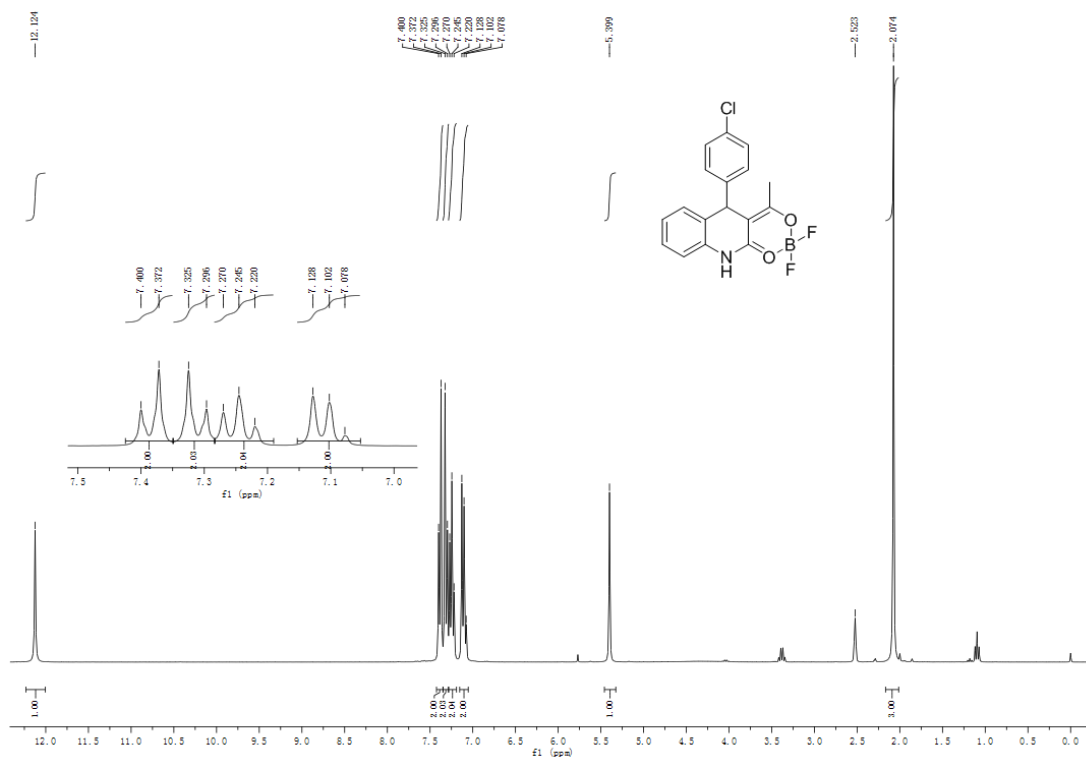

Current Data Parameters  
 NAME LX  
 EXPNO 4  
 PROCNO 1

F2 - Acquisition Parameters  
 Date\_ 201215  
 Time 23.07  
 INSTRUM av400  
 PROBHD 5 mm BBO BB-1H  
 PULPROG zgpg  
 TD 16384  
 SOLVENT DMSO  
 NS 427  
 DS 4  
 SWH 25125.620 Hz  
 FIDRES 1.532547 Hz  
 AQ 0.326916 sec  
 RG 4096  
 DW 19.500 usec  
 DE 6.00 usec  
 TE 300.0 K  
 D1 0.6000002 sec  
 d11 0.0300000 sec

\*\*\*\*\* CHANNEL f1 \*\*\*\*\*  
 NUC1 13C  
 P1 2.90 usec  
 PL1 -3.00 dB  
 SFO1 100.5785294 MHz

\*\*\*\*\* CHANNEL f2 \*\*\*\*\*  
 CPDPRG2 waltz16  
 NUC2 1H  
 PCPD2 80.00 usec  
 PL2 -3.00 dB  
 PL12 17.37 dB  
 SFO2 399.9511939 MHz

F2 - Processing parameters  
 SI 16384  
 SF 100.5675472 MHz  
 WDW EM  
 SSB 0  
 LB 4.00 Hz  
 GB 0  
 PC 1.00

1D NMR plot parameters  
 CX 22.00 cm  
 CY 6.00 cm  
 F1P 203.478 ppm  
 F1 20382.74 Hz  
 F2P -2.638 ppm  
 F2 -285.42 Hz  
 PPMCM 9.33256 ppm/cm  
 HZCM 398.55273 Hz/cm

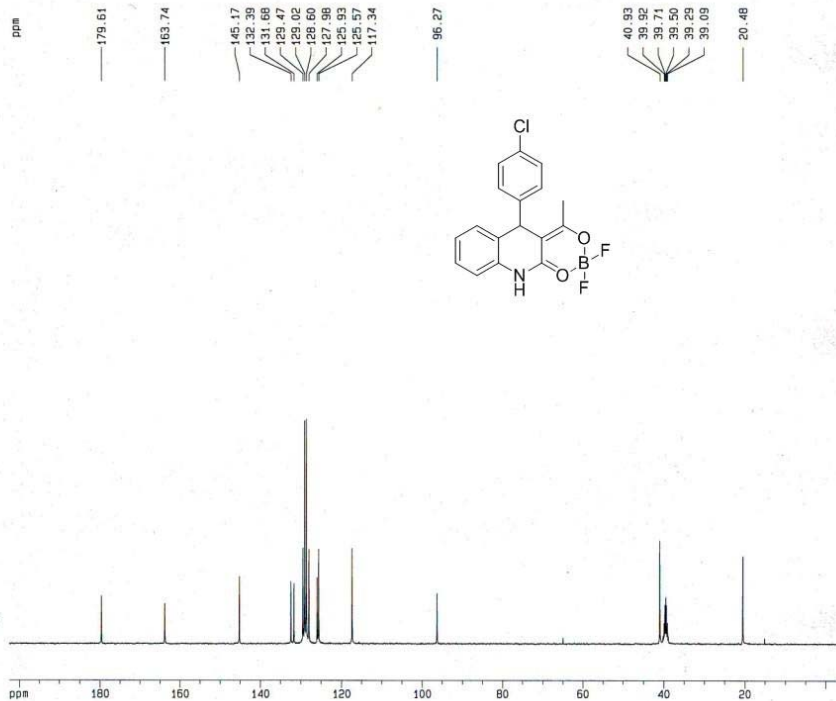







3h

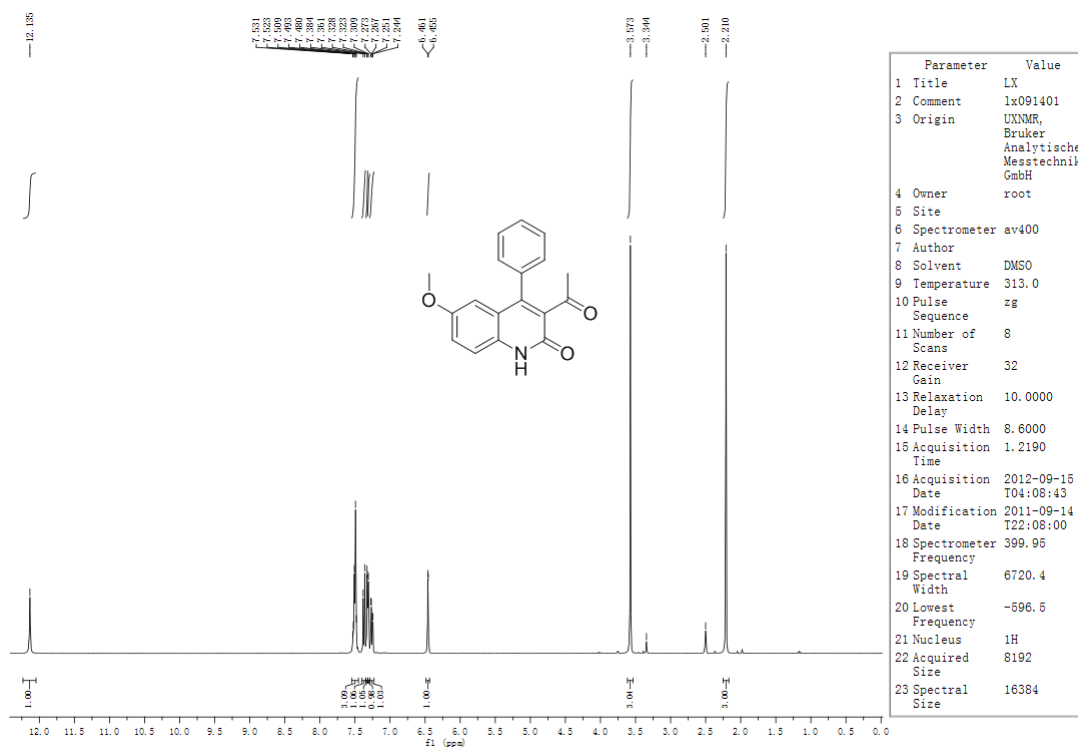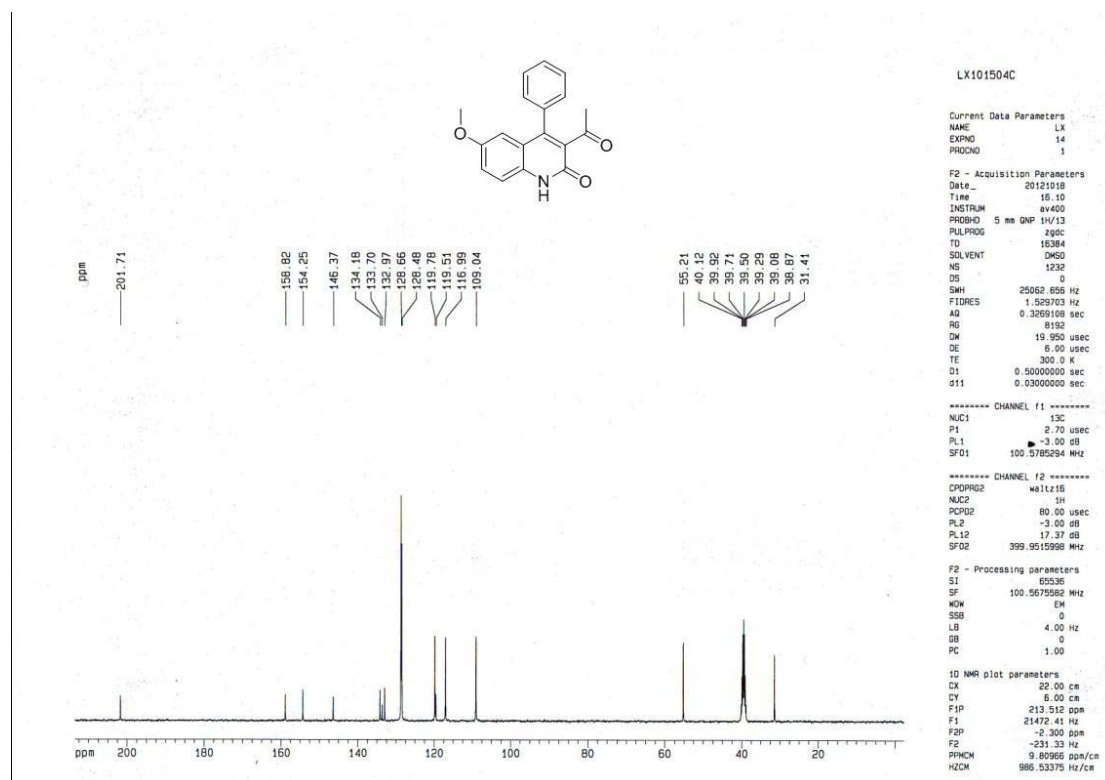

5a

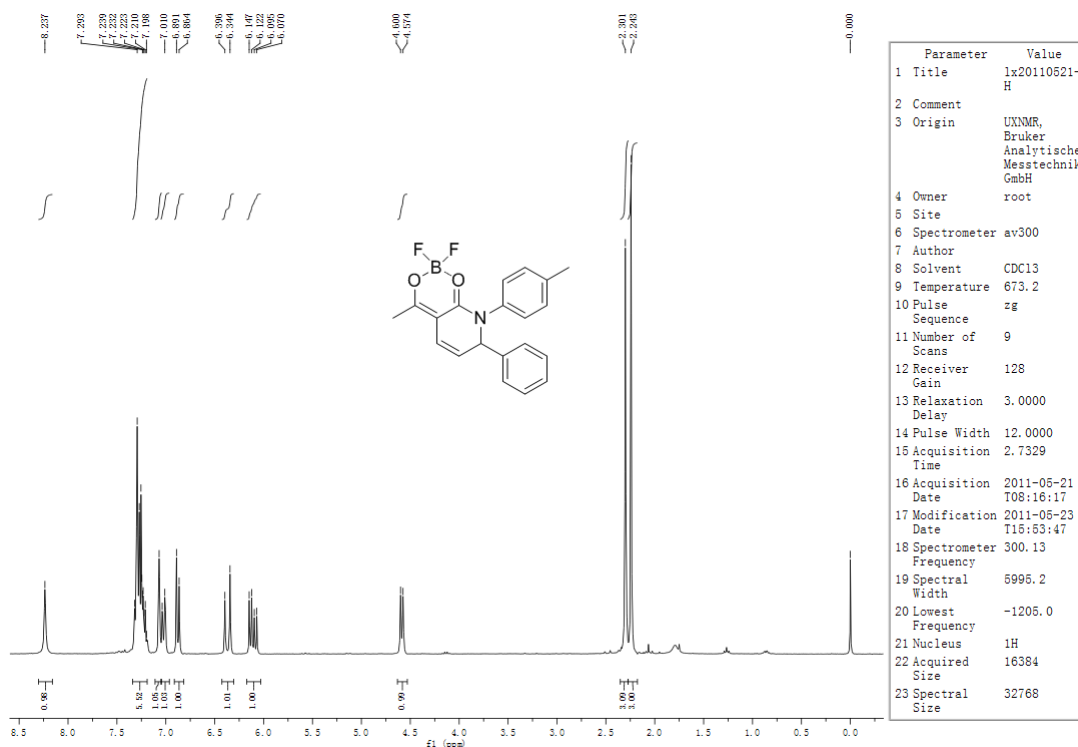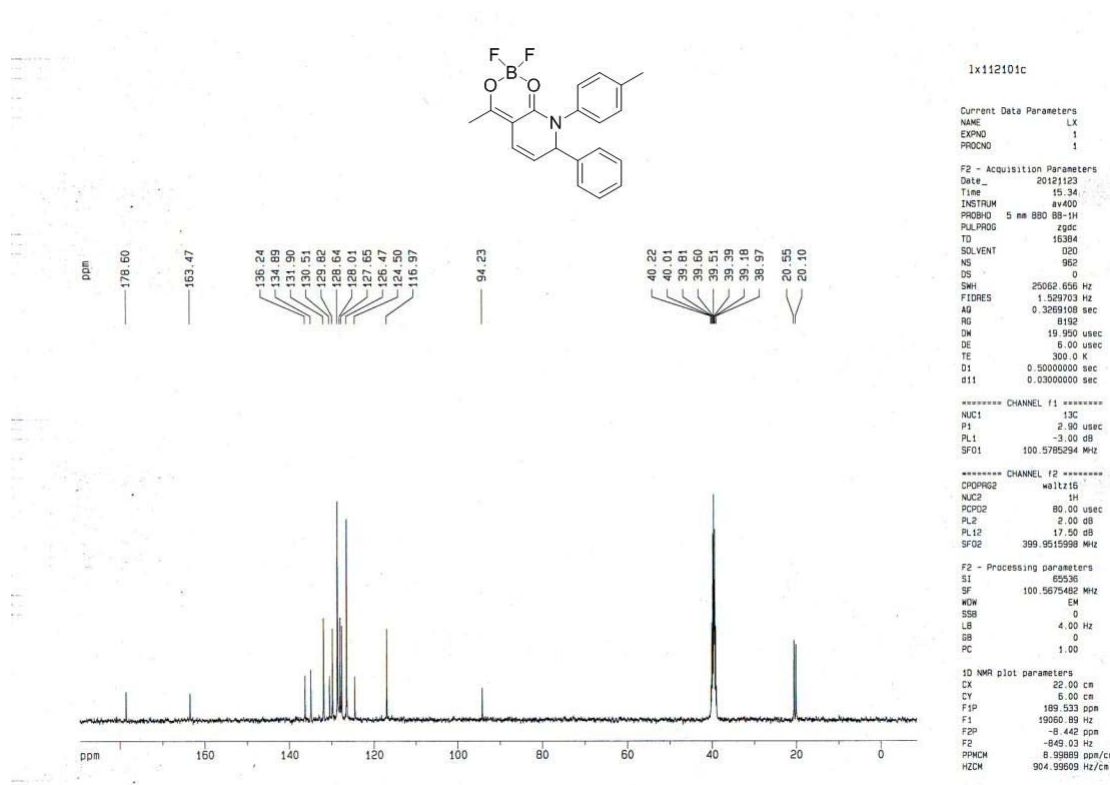



5c

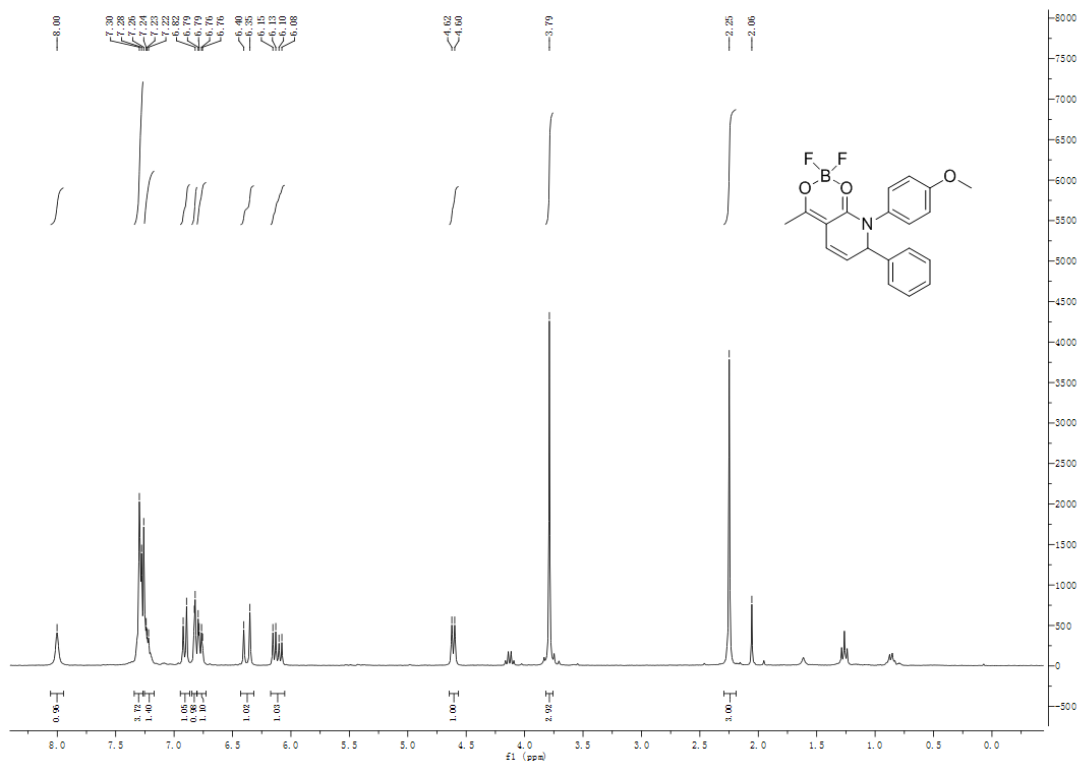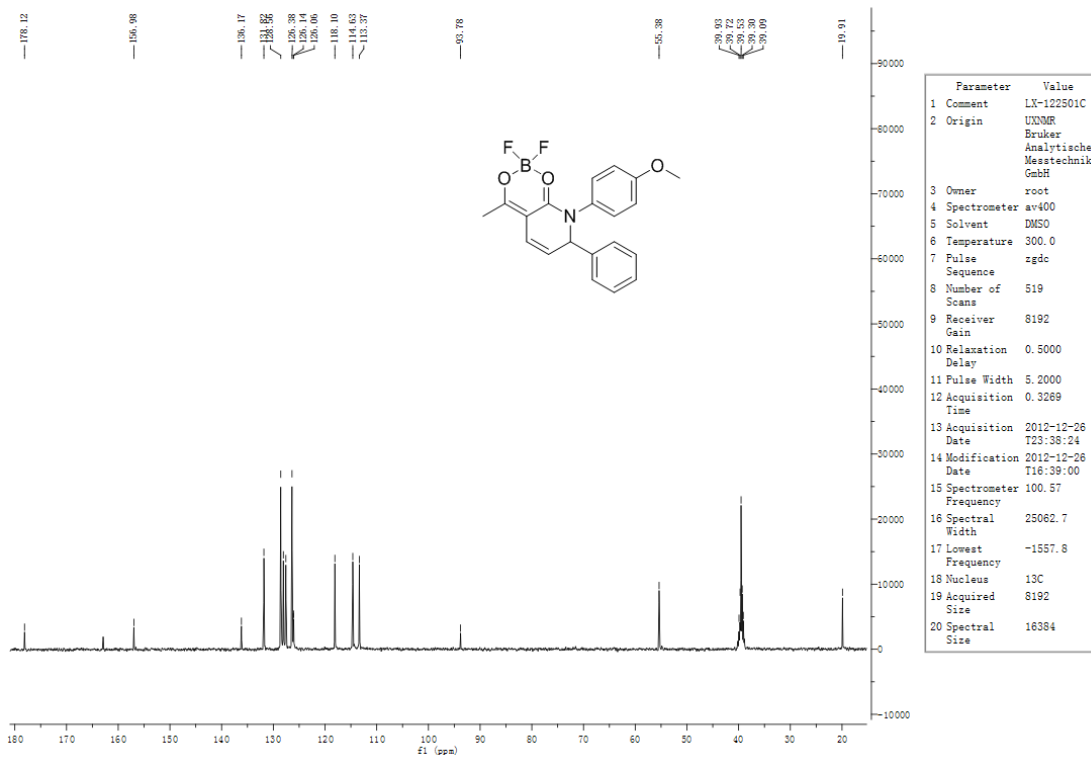

| Parameter                 | Value       |
|---------------------------|-------------|
| 1 Comment                 | LX-122501C  |
| 2 Origin                  | UNNMR       |
|                           | Bruker      |
|                           | Analytische |
|                           | Messtechnik |
|                           | GmbH        |
| 3 Owner                   | root        |
| 4 Spectrometer            | av400       |
| 5 Solvent                 | DMSO        |
| 6 Temperature             | 300.0       |
| 7 Pulse Sequence          | zgdc        |
| 8 Number of Scans         | 519         |
| 9 Receiver Gain           | 8192        |
| 10 Relaxation Delay       | 0.5000      |
| 11 Pulse Width            | 5.2000      |
| 12 Acquisition Time       | 0.3289      |
| 13 Acquisition Date       | 2012-12-26  |
|                           | T23:38:24   |
| 14 Modification Date      | 2012-12-26  |
|                           | T16:39:00   |
| 15 Spectrometer Frequency | 100.62      |
| 16 Spectral Width         | 25062.7     |
| 17 Lowest Frequency       | -1557.8     |
| 18 Nucleus                | 13C         |
| 19 Acquired Size          | 8192        |
| 20 Spectral Size          | 16384       |

5d

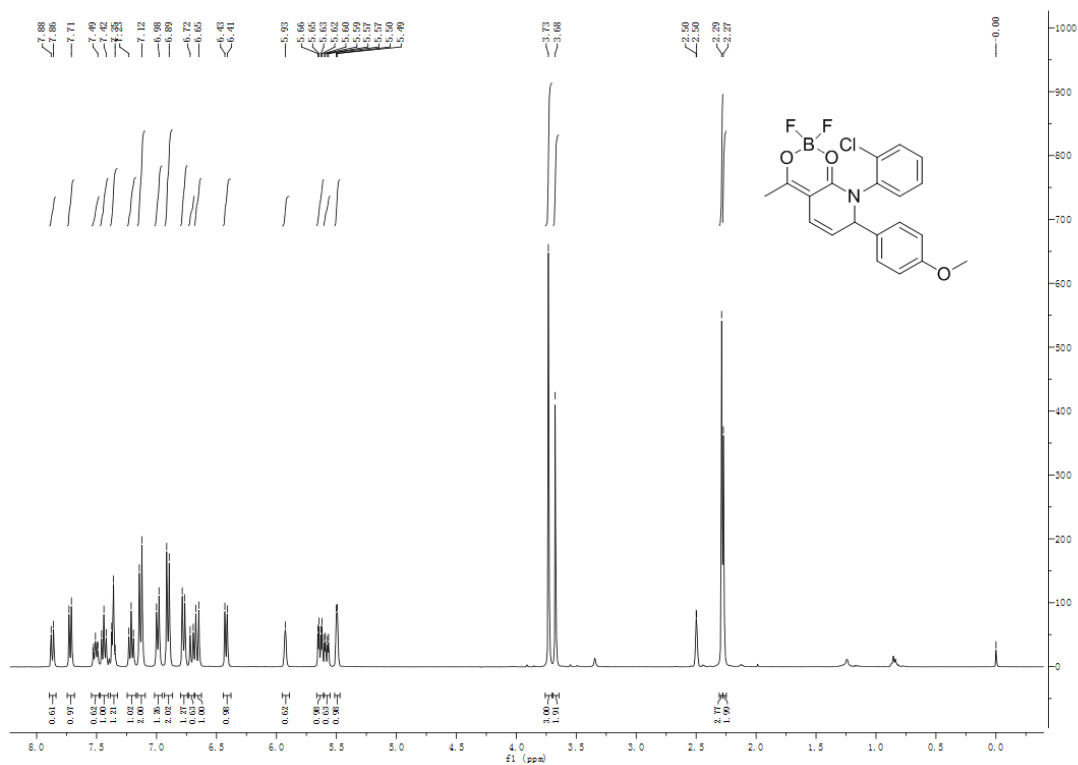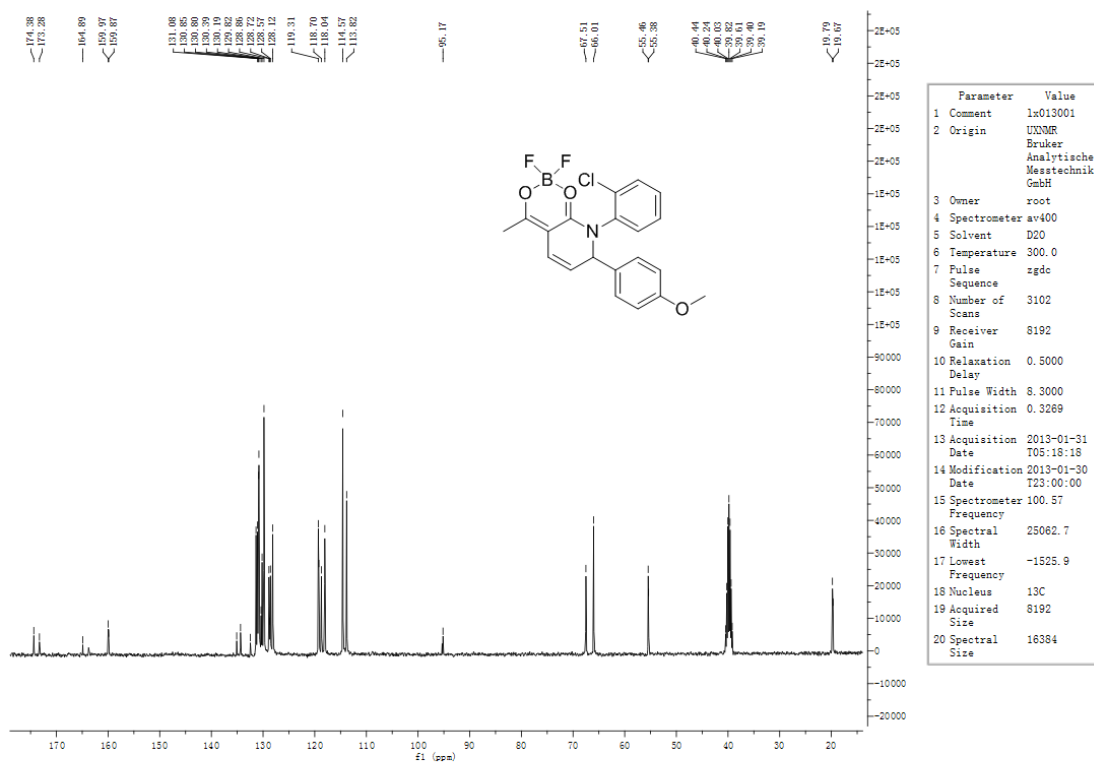

5e

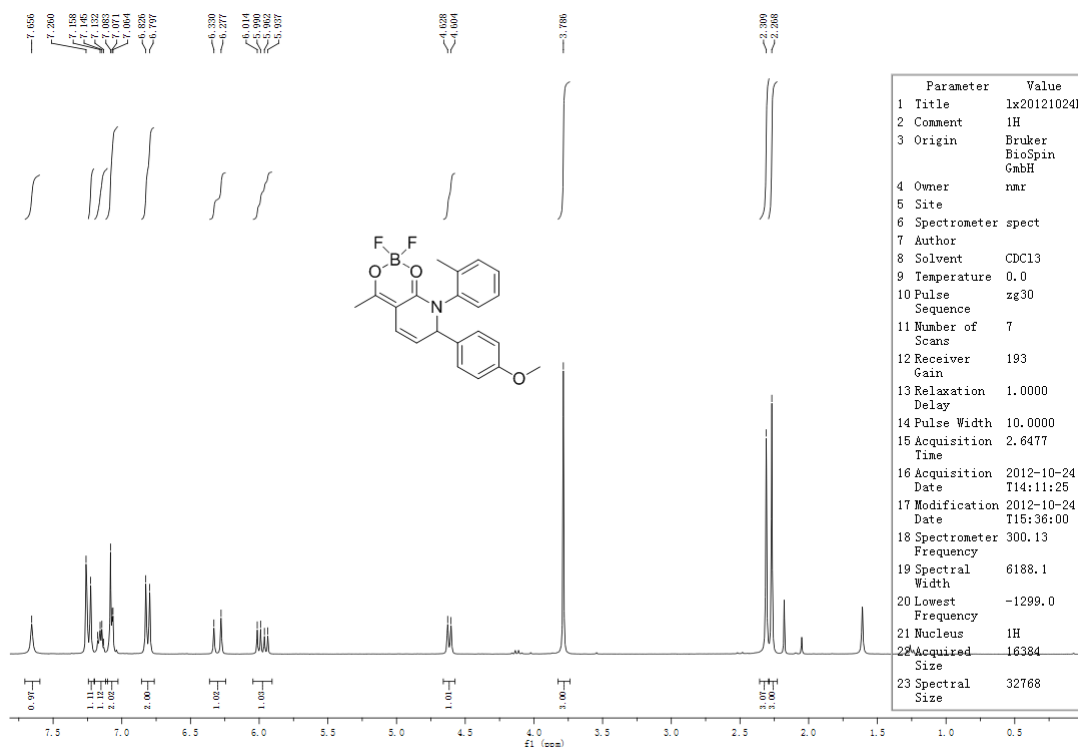

| Parameter                 | Value                     |
|---------------------------|---------------------------|
| 1 Title                   | lx20121024h               |
| 2 Comment                 | 1H                        |
| 3 Origin                  | Bruker<br>BioSpin<br>GmbH |
| 4 Owner                   | nmr                       |
| 5 Site                    |                           |
| 6 Spectrometer            | spect                     |
| 7 Author                  |                           |
| 8 Solvent                 | CDC13                     |
| 9 Temperature             | 0.0                       |
| 10 Pulse Sequence         | zg30                      |
| 11 Number of Scans        | 7                         |
| 12 Receiver Gain          | 193                       |
| 13 Relaxation Delay       | 1.0000                    |
| 14 Pulse Width            | 10.0000                   |
| 15 Acquisition Time       | 2.6477                    |
| 16 Acquisition Date       | 2012-10-24<br>T14:11:25   |
| 17 Modification Date      | 2012-10-24<br>T15:36:00   |
| 18 Spectrometer Frequency | 300.13                    |
| 19 Spectral Width         | 6188.1                    |
| 20 Lowest Frequency       | -1299.0                   |
| 21 Nucleus                | 1H                        |
| 22 Acquired Size          | 16384                     |
| 23 Spectral Size          | 32768                     |

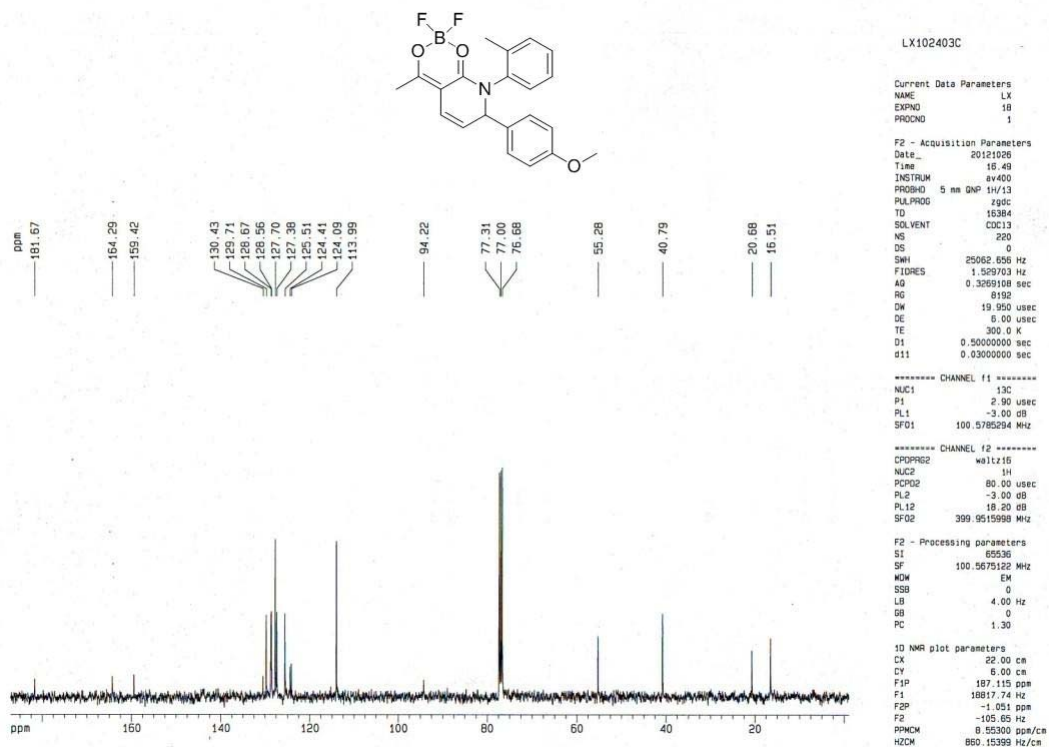

LX102403C

Current Data Parameters

|        |    |
|--------|----|
| NAME   | LX |
| EXPNO  | 18 |
| PROCNO | 1  |

F2 - Acquisition Parameters

|         |                |
|---------|----------------|
| Date_   | 20121026       |
| Time    | 15:49          |
| INSTRUM | av400          |
| PROBHD  | 5 mm QNP 1H/13 |
| PULPROG | zgpg30         |
| TD      | 16384          |
| SOLVENT | CDCl3          |
| NS      | 220            |
| DS      | 0              |
| SWH     | 25062.656 Hz   |
| FIDRES  | 1.529703 Hz    |
| AQ      | 0.3269108 sec  |
| RG      | 8192           |
| DW      | 19.950 usec    |
| DE      | 6.00 usec      |
| TE      | 300.0 K        |
| D1      | 0.50000000 sec |
| d11     | 0.03000000 sec |

\*\*\*\*\* CHANNEL f1 \*\*\*\*\*

|      |                 |
|------|-----------------|
| NUC1 | 13C             |
| PL1  | 2.90 usec       |
| PL12 | -3.00 dB        |
| SFO1 | 100.5785294 MHz |

\*\*\*\*\* CHANNEL f2 \*\*\*\*\*

|         |                 |
|---------|-----------------|
| CPDPRG2 | waltz16         |
| NUC2    | 1H              |
| PCPD2   | 86.00 usec      |
| PL2     | -3.00 dB        |
| PL12    | 18.20 dB        |
| SFO2    | 399.9515998 MHz |

F2 - Processing parameters

|     |                 |
|-----|-----------------|
| SI  | 65536           |
| SF  | 100.5675122 MHz |
| WDW | EK              |
| SSB | 0               |
| LB  | 4.00 Hz         |
| GB  | 0               |
| PC  | 1.30            |

1D NMR plot parameters

|       |                 |
|-------|-----------------|
| CK    | 22.00 cm        |
| CY    | 6.00 cm         |
| F1P   | 187.115 ppm     |
| F1    | 18817.74 Hz     |
| F2P   | -1.051 ppm      |
| F2    | -105.65 Hz      |
| PRMCM | 8.55300 ppm/cm  |
| HZCM  | 860.15399 Hz/cm |

5f

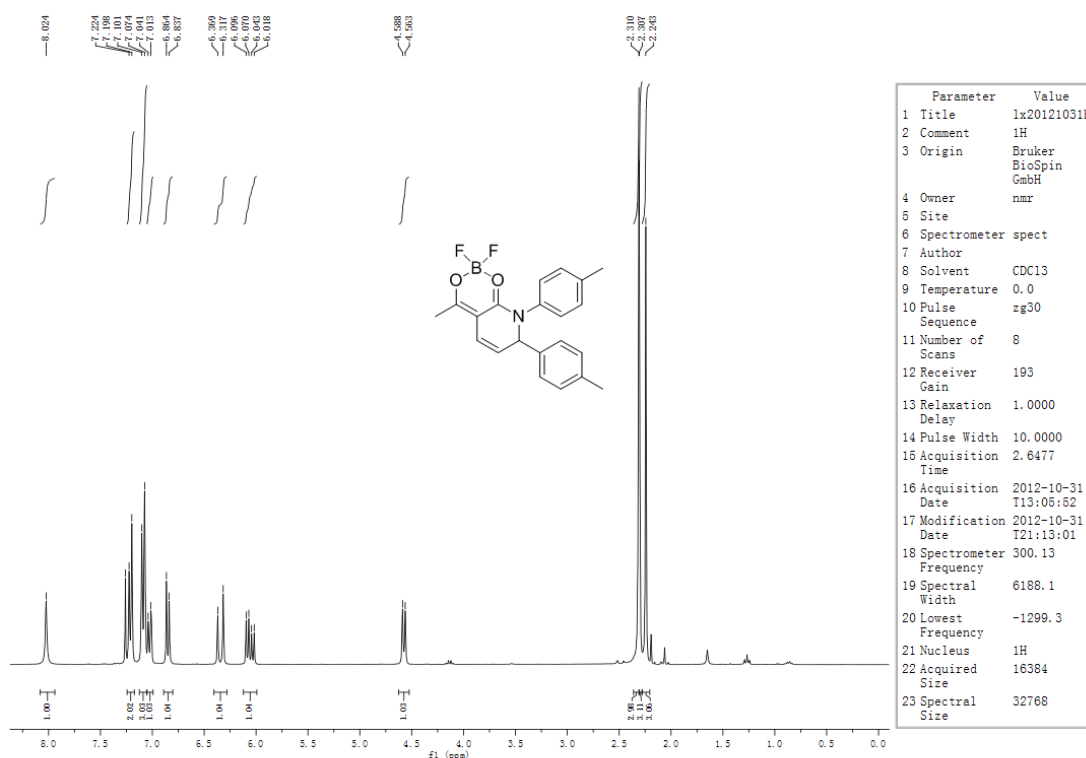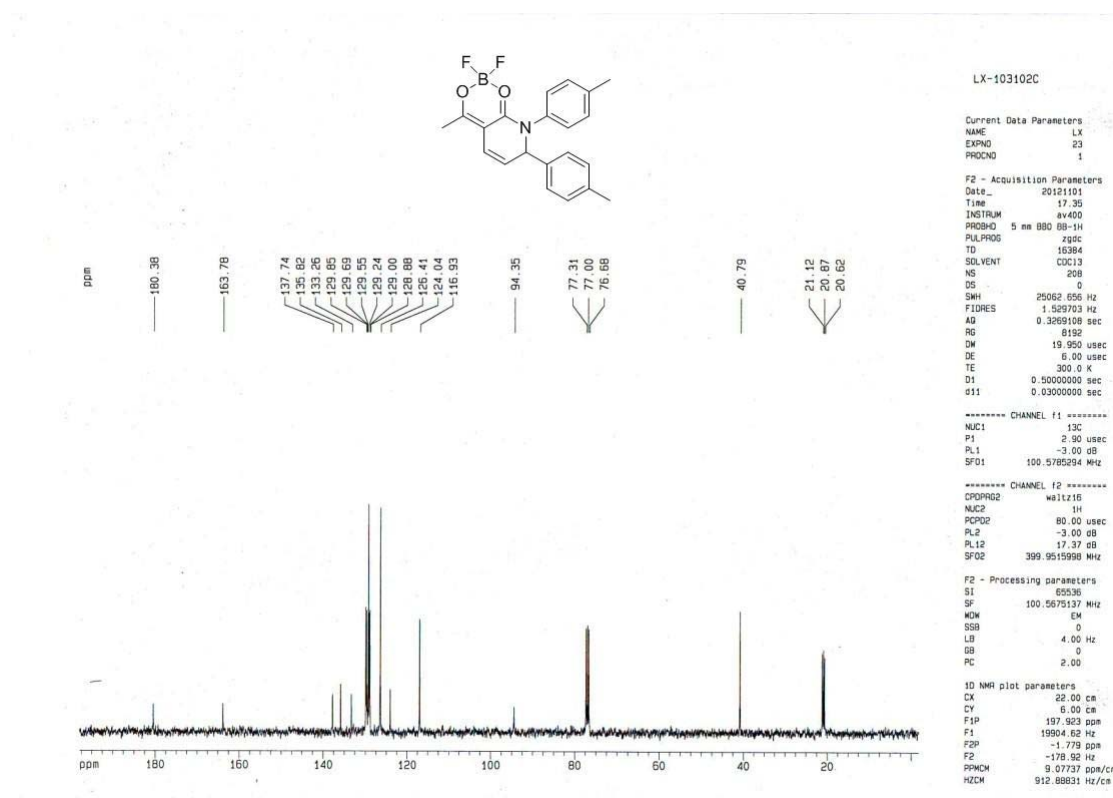

Supplement: c4ra06151a1.pdf [file c4ra06151a1.pdf]
